# Supplementary material
Source: ML conference proceedings conference paper supplement (https://proceedings.mlr.press/v108/kveton20a.html)
Supplement: Supplementary file [file kveton20a-supp.pdf]

## A Regret Bounds

The following lemma bounds the expected per-round regret of any randomized algorithm that chooses the perturbed solution in round  $t$ ,  $\tilde{\theta}_t$ , as a function of the history.

**Lemma 2.** *Let  $p_2 \geq \mathbb{P}_t(\bar{E}_{2,t})$ ,  $p_3 \leq \mathbb{P}_t(E_{3,t})$ , and  $p_3 > p_2$ . Then on event  $E_{1,t}$ ,*

$$\begin{aligned} \mathbb{E}_t[\Delta_{I_t}] &\leq \dot{\mu}_{\max}(c_1 + c_2) \left(1 + \frac{2}{p_3 - p_2}\right) \times \\ &\quad \mathbb{E}_t \left[ \|x_{I_t}\|_{G_t^{-1}} \right] + \Delta_{\max} p_2. \end{aligned}$$

*Proof.* Let  $\tilde{\Delta}_i = x_1^\top \theta_* - x_i^\top \theta_*$  and  $c = c_1 + c_2$ . Let

$$\bar{S}_t = \left\{ i \in [K] : c \|x_i\|_{G_t^{-1}} \geq \tilde{\Delta}_i \right\}$$

be the set of *undersampled arms* in round  $t$ . Note that  $1 \in \bar{S}_t$  by definition. We define the set of *sufficiently sampled arms* as  $S_t = [K] \setminus \bar{S}_t$ . Let  $J_t = \arg \min_{i \in \bar{S}_t} \|x_i\|_{G_t^{-1}}$  be the *least uncertain undersampled arm* in round  $t$ .

In all steps below, we assume that event  $E_{1,t}$  occurs. In round  $t$  on event  $E_{2,t}$ ,

$$\begin{aligned} \Delta_{I_t} &\leq \dot{\mu}_{\max} \tilde{\Delta}_{I_t} = \dot{\mu}_{\max} \left( \tilde{\Delta}_{J_t} + x_{J_t}^\top \theta_* - x_{I_t}^\top \theta_* \right) \leq \dot{\mu}_{\max} \left( \tilde{\Delta}_{J_t} + x_{J_t}^\top \tilde{\theta}_t - x_{I_t}^\top \tilde{\theta}_t + c (\|x_{I_t}\|_{G_t^{-1}} + \|x_{J_t}\|_{G_t^{-1}}) \right) \\ &\leq \dot{\mu}_{\max} c \left( \|x_{I_t}\|_{G_t^{-1}} + 2 \|x_{J_t}\|_{G_t^{-1}} \right), \end{aligned}$$

where the first inequality holds because  $\dot{\mu}_{\max}$  is the maximum derivative of  $\mu$ , the second is by the definitions of events  $E_{1,t}$  and  $E_{2,t}$ , and the last follows from the definitions of  $I_t$  and  $J_t$ . Now we take the expectation of both sides and get

$$\mathbb{E}_t[\Delta_{I_t}] = \mathbb{E}_t[\Delta_{I_t} \mathbf{1}\{E_{2,t}\}] + \mathbb{E}_t[\Delta_{I_t} \mathbf{1}\{\bar{E}_{2,t}\}] \leq \dot{\mu}_{\max} c \mathbb{E}_t \left[ \|x_{I_t}\|_{G_t^{-1}} + 2 \|x_{J_t}\|_{G_t^{-1}} \right] + \Delta_{\max} \mathbb{P}_t(\bar{E}_{2,t}).$$

The last step is to replace  $\mathbb{E}_t \left[ \|x_{J_t}\|_{G_t^{-1}} \right]$  with  $\mathbb{E}_t \left[ \|x_{I_t}\|_{G_t^{-1}} \right]$ . To do so, observe that

$$\mathbb{E}_t \left[ \|x_{I_t}\|_{G_t^{-1}} \right] \geq \mathbb{E}_t \left[ \|x_{I_t}\|_{G_t^{-1}} \mid I_t \in \bar{S}_t \right] \mathbb{P}_t(I_t \in \bar{S}_t) \geq \|x_{J_t}\|_{G_t^{-1}} \mathbb{P}_t(I_t \in \bar{S}_t),$$

where the last inequality follows from the definition of  $J_t$  and that  $\bar{S}_t$  is  $\mathcal{F}_{t-1}$ -measurable. We rearrange the inequality as  $\|x_{J_t}\|_{G_t^{-1}} \leq \mathbb{E}_t \left[ \|x_{I_t}\|_{G_t^{-1}} \right] / \mathbb{P}_t(I_t \in \bar{S}_t)$  and bound  $\mathbb{P}_t(I_t \in \bar{S}_t)$  from below next.

In particular, on event  $E_{1,t}$ ,

$$\begin{aligned} \mathbb{P}_t(I_t \in \bar{S}_t) &\geq \mathbb{P}_t \left( \exists i \in \bar{S}_t : x_i^\top \tilde{\theta}_t > \max_{j \in S_t} x_j^\top \tilde{\theta}_t \right) \geq \mathbb{P}_t \left( x_1^\top \tilde{\theta}_t > \max_{j \in S_t} x_j^\top \tilde{\theta}_t \right) \\ &\geq \mathbb{P}_t \left( x_1^\top \tilde{\theta}_t > \max_{j \in S_t} x_j^\top \tilde{\theta}_t, E_{2,t} \text{ occurs} \right) \geq \mathbb{P}_t \left( x_1^\top \tilde{\theta}_t > x_1^\top \theta_*, E_{2,t} \text{ occurs} \right) \\ &\geq \mathbb{P}_t \left( x_1^\top \tilde{\theta}_t > x_1^\top \theta_* \right) - \mathbb{P}_t(\bar{E}_{2,t}) \geq \mathbb{P}_t \left( x_1^\top \tilde{\theta}_t - x_1^\top \theta_* > c_1 \|x_1\|_{G_t^{-1}} \right) - \mathbb{P}_t(\bar{E}_{2,t}). \end{aligned}$$

Note that we require a sharp inequality because  $I_t \in \bar{S}_t$  is not guaranteed on event  $\left\{ \exists i \in \bar{S}_t : x_i^\top \tilde{\theta}_t \geq \max_{j \in S_t} x_j^\top \tilde{\theta}_t \right\}$ . The fourth inequality holds because on event  $E_{1,t} \cap E_{2,t}$ ,

$$x_j^\top \tilde{\theta}_t \leq x_j^\top \theta_* + c \|x_j\|_{G_t^{-1}} < x_j^\top \theta_* + \tilde{\Delta}_j = x_1^\top \theta_*$$

holds for any  $j \in S_t$ . The last inequality holds because  $x_1^\top \theta_* \leq x_1^\top \tilde{\theta}_t + c_1 \|x_1\|_{G_t^{-1}}$  holds on event  $E_{1,t}$ . Finally, we use the definitions of  $p_2$  and  $p_3$  to complete the proof.  $\square$

The regret bound of GLM-TSL is proved below.

**Theorem 3.** *The  $n$ -round regret of GLM-TSL is bounded as*

$$R(n) \leq \dot{\mu}_{\max}(c_1 + c_2) \left( 1 + \frac{2}{0.15 - 1/n} \right) \times \sqrt{2dn \log(2n/d)} + (\tau + 3)\Delta_{\max},$$

where

$$\begin{aligned} a &= c_1 \sqrt{\dot{\mu}_{\max}}, \\ c_1 &= \sigma \dot{\mu}_{\min}^{-1} \sqrt{d \log(n/d) + 2 \log n}, \\ c_2 &= c_1 \sqrt{2 \dot{\mu}_{\min}^{-1} \dot{\mu}_{\max} \log(Kn)}, \end{aligned}$$

and the number of exploration rounds  $\tau$  satisfies

$$\lambda_{\min}(G_\tau) \geq \max \{ \sigma^2 \dot{\mu}_{\min}^{-2} (d \log(n/d) + 2 \log n), 1 \}.$$

*Proof.* Fix  $\tau \in [n]$ . Let

$$E_{4,t} = \{ \|\bar{\theta}_t - \theta_*\|_2 \leq 1 \}$$

and  $p_4 \geq \mathbb{P}(\bar{E}_{4,t})$  for  $t \geq \tau$ . Let  $p_1 \geq \mathbb{P}(\bar{E}_{1,t}, E_{4,t})$ ,  $p_2 \geq \mathbb{P}_t(\bar{E}_{2,t})$  on event  $E_{4,t}$ , and  $p_3 \leq \mathbb{P}_t(E_{3,t})$ . By elementary algebra, we get

$$\begin{aligned} R(n) &\leq \sum_{t=\tau}^n \mathbb{E}[\Delta_{I_t}] + \tau \Delta_{\max} \\ &\leq \sum_{t=\tau}^n \mathbb{E}[\Delta_{I_t} \mathbb{1}\{E_{4,t}\}] + (\tau + p_4 n) \Delta_{\max} \\ &\leq \sum_{t=\tau}^n \mathbb{E}[\Delta_{I_t} \mathbb{1}\{E_{1,t}, E_{4,t}\}] + (\tau + (p_1 + p_4)n) \Delta_{\max} \\ &= \sum_{t=\tau}^n \mathbb{E}[\mathbb{E}_t[\Delta_{I_t}] \mathbb{1}\{E_{1,t}, E_{4,t}\}] + (\tau + (p_1 + p_4)n) \Delta_{\max}. \end{aligned}$$

To get  $p_1 \leq 1/n$ , we set  $c_1$  as in Lemma 8. Now we apply Lemma 2 to  $\mathbb{E}_t[\Delta_{I_t}] \mathbb{1}\{E_{1,t}, E_{4,t}\}$  and get

$$R(n) \leq \dot{\mu}_{\max}(c_1 + c_2) \left( 1 + \frac{2}{p_3 - p_2} \right) \mathbb{E} \left[ \sum_{t=\tau}^n \|x_{I_t}\|_{G_t^{-1}} \right] + (\tau + (p_1 + p_2 + p_4)n) \Delta_{\max},$$

where  $a$  and  $c_2$  are set as in Lemma 4. For these settings,  $p_2 \leq 1/n$  and  $p_3 \geq 0.15$ . To bound  $\sum_{t=\tau}^n \|x_{I_t}\|_{G_t^{-1}}$ , we use Lemma 2 in Li et al. [2017]. Finally, to get  $p_4 \leq 1/n$ , we choose  $\tau$  as in Lemma 9.  $\square$

The regret bound of GLM-FPL is proved below.

**Theorem 5.** *The  $n$ -round regret of GLM-FPL is bounded as*

$$R(n) \leq \dot{\mu}_{\max}(c_1 + c_2) \left( 1 + \frac{2}{0.15 - 2/n} \right) \times \sqrt{2dn \log(2n/d)} + (\tau + 4)\Delta_{\max},$$

where

$$\begin{aligned} a &= c_1 \dot{\mu}_{\max}, \\ c_1 &= \sigma \dot{\mu}_{\min}^{-1} \sqrt{d \log(n/d) + 2 \log n}, \\ c_2 &= c_1 \dot{\mu}_{\min}^{-1} \dot{\mu}_{\max} \sqrt{2 \log(Kn)}, \end{aligned}$$

and the number of exploration rounds  $\tau$  satisfies

$$\lambda_{\min}(G_\tau) \geq \max\{4\sigma^2\dot{\mu}_{\min}^{-2}(d \log(n/d) + 2 \log n), 8a^2\dot{\mu}_{\min}^{-2} \log n, 1\}.$$

*Proof.* The proof is almost identical to that of Theorem 3. There are two main differences. First,  $a$  and  $c_2$  are set as in Lemma 6. For these settings,  $p_2 \leq 2/n$  and  $p_3 \geq 0.15$ . Second,  $\tau$  is set as in Lemma 10.  $\square$

## B Technical Lemmas

We need an extension of Theorem 1 in Abbasi-Yadkori et al. [2011], which is concerned with concentration of a certain vector-valued martingale. The setup of the claim is as follows. Let  $(\mathcal{F}_t)_{t \geq 0}$  be a filtration,  $(\eta_t)_{t \geq 1}$  be a stochastic process such that  $\eta_t$  is real-valued and  $\mathcal{F}_t$ -measurable, and  $(X_t)_{t \geq 1}$  be another stochastic process such that  $X_t$  is  $\mathbb{R}^d$ -valued and  $\mathcal{F}_{t-1}$ -measurable. We also assume that  $(\eta_t)_t$  is conditionally  $R^2$ -sub-Gaussian, that is

$$\forall \lambda \in \mathbb{R} : \quad \mathbb{E}[\exp[\lambda \eta_t] \mid \mathcal{F}_{t-1}] \leq \exp\left[\frac{\lambda^2 R^2}{2}\right]. \quad (10)$$

We call the triplet  $((X_t)_t, (\eta_t)_t, \mathbb{F})$  “nice” when these conditions hold. The modified claim is stated and proved below.

**Lemma 7.** *Let  $((X_t)_t, (\eta_t)_t, \mathbb{F})$  be a “nice” triplet,  $S_t = \sum_{s=1}^t \eta_s X_s$ ,  $V_t = \sum_{s=1}^t X_s X_s^\top$ ; and for  $V \succ 0$ , let  $\tau_0 = \min\{t \geq 1 : V_t \succeq V\}$ . Then for any  $\delta \in (0, 1)$  and  $\mathbb{F}$ -stopping time  $\tau \geq 1$  such that  $\tau \geq \tau_0$  holds almost surely, with probability at least  $1 - \delta$ ,*

$$\|S_\tau\|_{V_\tau^{-1}}^2 \leq 2R^2 \log\left(\frac{\det(V_\tau)^{\frac{1}{2}} \det(V_{\tau_0})^{-\frac{1}{2}}}{\delta}\right).$$

*Proof.* The proof in Abbasi-Yadkori et al. [2011] can easily be adjusted as follows. If  $((X_t)_t, (\eta_t)_t, \mathbb{F})$  is a “nice” triplet, then for any  $\delta \in (0, 1)$ ,  $\mathcal{F}_0$ -measurable matrix  $V \succ 0$ , and stopping time  $\tau \geq 1$ ,

$$\mathbb{P}\left(\|S_\tau\|_{V_\tau^{-1}}^2 \leq 2R^2 \log\left(\frac{\det(V_\tau)^{\frac{1}{2}} \det(V_{\tau_0})^{-\frac{1}{2}}}{\delta}\right) \mid \mathcal{F}_0\right) \geq 1 - \delta. \quad (11)$$

Now, for  $t \geq 0$ , let  $X'_t = X_{\tau_0+t}$ ,  $\eta'_t = \eta_{\tau_0+t}$ , and  $\mathcal{F}'_t = \mathcal{F}_{\tau_0+t}$ . Then  $((X'_t)_{t \geq 1}, (\eta'_t)_{t \geq 1}, (\mathcal{F}'_t)_{t \geq 0})$  is a nice triplet and the result follows from (11).  $\square$

We use the last lemma to prove the following result.

**Lemma 8.** *Let  $c_1 = \sigma \dot{\mu}_{\min}^{-1} \sqrt{d \log(n/d) + 2 \log n}$  and  $\tau$  be any round such that  $\lambda_{\min}(G_\tau) \geq 1$ . Then for any  $t \geq \tau$ ,*

$$\mathbb{P}(\bar{E}_{1,t} \text{ occurs}, \|\bar{\theta}_t - \theta_*\|_2 \leq 1) \leq 1/n.$$

*Proof.* Let  $S_t = \sum_{\ell=1}^{t-1} (Y_\ell - \mu(X_\ell^\top \theta_*)) X_\ell$ . By Lemma 1, where  $\mathcal{D}_1 = \{(X_\ell, \mu(X_\ell^\top \theta_*))\}_{\ell=1}^{t-1}$  and  $\mathcal{D}_2 = \{(X_\ell, Y_\ell)\}_{\ell=1}^{t-1}$ , we have that

$$S_t = \underbrace{\nabla^2 L(\mathcal{D}_1; \theta')}_V (\bar{\theta}_t - \theta_*),$$

where  $\theta' = \alpha \theta_* + (1 - \alpha) \bar{\theta}_t$  for  $\alpha \in [0, 1]$ . We rearrange the equality as  $V^{-1} S_t = \bar{\theta}_t - \theta_*$  and note that  $\dot{\mu}_{\min} G_t \preceq V$  on  $\|\bar{\theta}_t - \theta_*\|_2 \leq 1$ . Now fix arm  $i$ . By the Cauchy-Schwarz inequality and from the above discussion,

$$\begin{aligned} |x_i^\top \bar{\theta}_t - x_i^\top \theta_*| &\leq \|\bar{\theta}_t - \theta_*\|_{G_t} \|x_i\|_{G_t^{-1}} = (\bar{\theta}_t - \theta_*)^\top G_t (\bar{\theta}_t - \theta_*) \|x_i\|_{G_t^{-1}} \\ &= S_t^\top V^{-1} G_t V^{-1} S_t \|x_i\|_{G_t^{-1}} \leq \dot{\mu}_{\min}^{-2} \|S_t\|_{G_t^{-1}} \|x_i\|_{G_t^{-1}}. \end{aligned}$$

By (13) in Lemma 9, which is derived using Lemma 7,  $\|S_t\|_{G_t^{-1}} \leq \sigma \sqrt{d \log(n/d) + 2 \log n}$  holds with probability at least  $1 - 1/n$  in any round  $t \geq \tau$ . In this case, event  $E_{1,t}$  is guaranteed to occur when  $c_1$  is set as in the claim. It follows that  $\bar{E}_{1,t}$  occurs on  $\|\bar{\theta}_t - \theta_*\|_2 \leq 1$  with probability of at most  $1/n$ .  $\square$

The number of initial exploration rounds in GLM-TSL is set below.

**Lemma 9.** *Let  $\tau$  be any round such that*

$$\lambda_{\min}(G_\tau) \geq \max \{ \sigma^2 \dot{\mu}_{\min}^{-2} (d \log(n/d) + 2 \log n), 1 \} .$$

*Then for any  $t \geq \tau$ ,  $\mathbb{P}(\|\bar{\theta}_t - \theta_*\|_2 > 1) \leq 1/n$ .*

*Proof.* Fix round  $t$  and let  $S_t = \sum_{\ell=1}^{t-1} (Y_\ell - \mu(X_\ell^\top \theta_*)) X_\ell$ . By the same argument as in the proof of Theorem 1 in [Li et al. \[2017\]](#), who use Lemma A of [Chen et al. \[1999\]](#), we have that

$$\|S_t\|_{G_t^{-1}} \leq \dot{\mu}_{\min} \sqrt{\lambda_{\min}(G_t)} \implies \|\bar{\theta}_t - \theta_*\|_2 \leq 1$$

Now fix  $\tau$  such that  $\lambda_{\min}(G_\tau) \geq 1$ . For any  $t \geq \tau$ ,  $G_t \succeq G_\tau$  and thus

$$\|S_t\|_{G_t^{-1}} \leq \dot{\mu}_{\min} \sqrt{\lambda_{\min}(G_\tau)} \implies \|\bar{\theta}_t - \theta_*\|_2 \leq 1. \quad (12)$$

In the next step, we bound  $\|S_t\|_{G_t^{-1}}$  from above. By Lemma 7,

$$\|S_t\|_{G_t^{-1}}^2 \leq 2\sigma^2 \log(\det(G_t)^{\frac{1}{2}} \det(G_\tau)^{-\frac{1}{2}} n)$$

holds jointly in all rounds  $t \geq \tau$  with probability at least  $1 - 1/n$ . By Lemma 11 in [Abbasi-Yadkori et al. \[2011\]](#) and from  $\|X_t\|_2 \leq 1$ , we get  $\log \det(G_t) \leq d \log(n/d)$ . By the choice of  $\tau$ ,  $\det(G_\tau)^{-1} \leq 1$ . It follows that

$$\|S_t\|_{G_t^{-1}}^2 \leq \sigma^2 (d \log(n/d) + 2 \log n) \quad (13)$$

for any  $t \geq \tau$  with probability at least  $1 - 1/n$ . Now we combine this claim with (12) and have that  $\|\bar{\theta}_t - \theta_*\|_2 \leq 1$  holds with probability at least  $1 - 1/n$  when

$$\lambda_{\min}(G_\tau) \geq \sigma^2 \dot{\mu}_{\min}^{-2} (d \log(n/d) + 2 \log n) .$$

This concludes the proof. □

The number of initial exploration rounds in GLM-FPL is set below.

**Lemma 10.** *Let  $\tau$  be any round such that*

$$\lambda_{\min}(G_\tau) \geq \max \{ 4\sigma^2 \dot{\mu}_{\min}^{-2} (d \log(n/d) + 2 \log n), 8a^2 \dot{\mu}_{\min}^{-2} \log n, 1 \} .$$

*Then for any  $t \geq \tau$ ,  $\mathbb{P}(\|\bar{\theta}_t - \theta_*\|_2 > 1/2) \leq 1/n$  and  $\mathbb{P}_t(\|\tilde{\theta}_t - \theta_*\|_2 > 1) \leq 1/n$  on event  $\|\bar{\theta}_t - \theta_*\|_2 \leq 1/2$ .*

*Proof.* Fix round  $t$ . Let  $S_t$  be defined as in Lemma 9 and  $\tau_1$  be any round such that

$$\lambda_{\min}(G_{\tau_1}) \geq \min \{ 4\sigma^2 \dot{\mu}_{\min}^{-2} (d \log(n/d) + 2 \log n), 1 \} .$$

Then by the same argument as in Lemma 9,  $\mathbb{P}(\|\bar{\theta}_t - \theta_*\|_2 > 1/2) \leq 1/n$  holds for any  $t \geq \tau_1$ .

Now fix round  $t$ , history  $\mathcal{F}_{t-1}$ , and assume that  $\|\bar{\theta}_t - \theta_*\|_2 \leq 1/2$  holds. Let

$$\bar{S}_t = \sum_{\ell=1}^{t-1} (Y_\ell + Z_\ell - \mu(X_\ell^\top \bar{\theta}_t)) X_\ell = \sum_{\ell=1}^{t-1} Z_\ell X_\ell ,$$

where the last equality holds because  $\sum_{\ell=1}^{t-1} (Y_\ell - \mu(X_\ell^\top \bar{\theta}_t)) X_\ell = \mathbf{0}$ . Since  $\|\bar{\theta}_t - \theta_*\|_2 \leq 1/2$ , the 0.5-ball centered at  $\bar{\theta}_t$  is within the unit ball centered at  $\theta_*$ . So, the minimum derivative of  $\mu$  in the 0.5-ball is not larger than that in the unit ball, and we have by a similar argument to Lemma 9 that

$$\|\bar{S}_t\|_{G_t^{-1}} \leq \frac{1}{2} \dot{\mu}_{\min} \sqrt{\lambda_{\min}(G_t)} \implies \|\tilde{\theta}_t - \bar{\theta}_t\|_2 \leq \frac{1}{2} . \quad (14)$$

By definition,  $\|\bar{S}_t\|_{G_t^{-1}} = \|U\|_2$  for  $U = G_t^{-\frac{1}{2}} \sum_{\ell=1}^{t-1} Z_\ell X_\ell$ . Since  $Z_\ell$  are i.i.d. random variables that are resampled in each round, we have  $U \sim \mathcal{N}(\mathbf{0}, a^2 I_d)$  given  $\mathcal{F}_{t-1}$ , and that  $\|U\|_2 \leq a\sqrt{2\log n}$  holds with probability at least  $1 - 1/n$  given  $\mathcal{F}_{t-1}$ . Now we combine this claim with (14) and have that  $\|\tilde{\theta}_t - \bar{\theta}_t\|_2 \leq 1/2$  holds with probability at least  $1 - 1/n$  for any round  $t$  such that

$$\lambda_{\min}(G_t) \geq 8a^2 \mu_{\min}^{-2} \log n.$$

For any such round, when  $\|\bar{\theta}_t - \theta_*\|_2 \leq 1/2$  holds,  $\mathbb{P}_t \left( \|\tilde{\theta}_t - \theta_*\|_2 \leq 1 \right) \geq 1 - 1/n$ . This concludes our proof. □
